# Supplementary material for: Symmetry breaking meets multisite modification
Source: eLife. 2021 May 21;10:e65358. doi: 10.7554/eLife.65358 (PMC8439660; doi:10.7554/eLife.65358)
Supplement: Appendix 2—figure 2—source data 1. [file elife-65358-app2-fig2-data1.xlsx]

## Sheet: Sheet1
	Parameter values
	Figure		Appendix 2 Figure 2
	This file lists the parameter values used to generate the plot (using the relevant model descriptions in the appendix).
	Note that the relevant symmetries are assumed in the parameters and that unless otherwise specified below, all parameters involved have the value 1
	A. Panel 1 - Hopf Bifurcation
	k1	100	a2	2	KTotal	1
	k2	20	a3	100	PTotal	1
	k4	2	a4	20
	kb1	100	ab1	100
	kb3	100	ab3	100
	B. Panel 2 - Dynamic simulation
	Parameter set in Fig 3A where ATotal = 12.95
	C. Panel 3 - Pitchfork Bifurcation
	k1	0.1	a1	2	KTotal	1
	k3	2	a2	5	PTotal	1
	k4	5	a3	0.1
