# Supplementary material for: Symmetry breaking meets multisite modification
Source: eLife. 2021 May 21;10:e65358. doi: 10.7554/eLife.65358 (PMC8439660; doi:10.7554/eLife.65358)
Supplement: Appendix 2—figure 5—source data 1. [file elife-65358-app2-fig5-data1.xlsx]

## Sheet: Sheet1
	Parameter values
	Figure		Appendix 2 Figure 5
	This file lists the parameter values used to generate the plot (using the relevant model descriptions in the appendix).
	Note that the relevant symmetries are assumed in the parameters and that unless otherwise specified below, all parameters involved have the value 1
	k1	1.25	a1	1.25	K1Total	1
	k2	1.1			P1Total	1
	k3	2.5	a3	2.5	K2Total	1
	k4	0.4	a4	0.4	P2Total	1
