# Supplementary material for: Symmetry breaking meets multisite modification
Source: eLife. 2021 May 21;10:e65358. doi: 10.7554/eLife.65358 (PMC8439660; doi:10.7554/eLife.65358)
Supplement: Appendix 2—figure 7—source data 1. [file elife-65358-app2-fig7-data1.xlsx]

## Sheet: Sheet1
	Parameter values
	Figure		Appendix 2 Figure 7
	This file lists the parameter values used to generate the plot (using the relevant model descriptions in the appendix).
	Note that the relevant symmetries are assumed in the parameters and that unless otherwise specified below, all parameters involved have the value 1
	Left Panel
	k1	30	a1	0.3	KTotal	1
	k2	2	a2	20	PTotal	1
	k3	0.3	a3	30
	k4	20	a4	2
	kb1	100	ab1	100
	kb3	100	ab2	0.1
	kb4	0.1	ab3	100
	Right Panel
	Same parameters as earlier except total enzyme amounts				KTotal	20
					PTotal	20
