# Supplementary material for: Symmetry breaking meets multisite modification
Source: eLife journal article supplement (doi:10.7554/elife.65358), 2021-05-21
Supplement: supp [file elife_poa_e65358_Figure_2_source_data_1.xlsx]

## Sheet: Sheet1
	Parameter values
	Figure		2		Main text
	This file lists the parameter values used to generate the plot (using the relevant model descriptions in the appendix).
	Note that the relevant symmetries are assumed in the parameters and that unless otherwise specified below, all parameters involved have the value 1
	2.A
	k1	0.1			KTotal	0.1
	k2	0.5			PTotal	0.1
	k3	0.1
	k4	0.5
	2.B
	k1	0.1	a1	0.25	KTotal	1
	k3	0.1	a2	0.4	PTotal	1
			a3	0.25
			a4	0.4
	2.C
	k1	0.1	a1	0.5	K1Total	1
	k3	0.1	a2	1.5	P1Total	1
			a3	0.5	K2Total	1
			a4	1.5	P2Total	1
	2.D
	k1	2.35	a1	2.35	K1Total	1
	k3	0.46	a2	0.46	P1Total	1
	k3	1.86	a3	1.86	K2Total	1
	k4	1.1	a4	1.1	P2Total	1
	2.E
	k1	2	a1	2	K1Total	0.1
	k3	0.1	a2	0.1	K2Total	0.1
	k3	0.75	a3	0.75	PTotal	0.2
