# Supplementary material for: Symmetry breaking meets multisite modification
Source: eLife journal article supplement (doi:10.7554/elife.65358), 2021-05-21
Supplement: supp [file elife_poa_e65358_Figure_3_source_data_1.xlsx]

## Sheet: Sheet1
	Parameter values
	Figure		3		Main text
	This file lists the parameter values used to generate the plot (using the relevant model descriptions in the appendix).
	Note that the relevant symmetries are assumed in the parameters and that unless otherwise specified below, all parameters involved have the value 1
	3.A (Panel 1 - Hopf and Pitchfork Bifurcation)
	k1	100	a1	0.01	KTotal	1.25
	k2	2	a2	20	PTotal	1.25
	k3	0.01	a3	100
	k4	20	a4	2
	kb1	100	ab1	100
	kb3	100	ab2	0.1
	kb4	0.1	ab3	100
	3.A (Panel 2 - Pitchfork Bifurcation)
	k1	100	a1	0.01	KTotal	10
	k2	2	a2	20	PTotal	10
	k3	0.01	a3	100
	k4	20	a4	2
	kb1	100	ab1	100
	kb3	100	ab2	0.1
	kb4	0.1	ab3	100
	3.B (Panel 1 - Hopf Bifurcation)
	k1	150	a1	1	K1Total	1
	k2	50	a2	10	P1Total	1
	k3	1	a3	150	K2Total	1
	k4	10	a4	50	P2Total	1
	kb1	100	ab1	0.01
	kb3	0.01	ab2	500
	kb4	500	ab3	100
	3.B (Panel 2 - Pitchfork Bifurcation)
	k1	10	a1	2	K1Total	1
	k2	1	a2	5	P1Total	1
	k3	2	a3	10	K2Total	1
	k4	5	a4	1	P2Total	1
